# Supplementary material for: A nano-integrated diagnostic and therapeutic platform with oxidation–reduction reactions in tumor microenvironments
Source: Royal Society of Chemistry journal article supplement (doi:10.1039/c9na00786e), 2020-01-01
Supplement: c9na00786e1.pdf [file c9na00786e1.pdf]

## Supporting Information

### A nano-integrated diagnostic and therapeutic platform with oxidation-reduction reactions in tumor microenvironment

Lei Zhao<sup>†,‡</sup> Guihua Qiu<sup>†</sup> Kai Wang<sup>†</sup> Hu Chen<sup>†</sup> Fengkai Ruan<sup>†</sup> Nan Liu<sup>†</sup> Zifeng Deng<sup>†</sup>  
Youliang Yao<sup>†</sup> Dongbei Guo<sup>†</sup> Dai Wang<sup>†</sup> Li Sha<sup>‡</sup> Xiangyu Kong<sup>‡</sup> Wenzhi Liu<sup>‡</sup> and  
Yongxing Zhang<sup>†</sup>

<sup>†</sup>State Key Laboratory of Molecular Vaccinology and Molecular Diagnostics, School  
of Public Health, Xiamen University, Xiamen, Fujian, 361102, PR China.

<sup>‡</sup>Affiliated Zhongshan Hospital of Dalian University, Dalian, Liaoning, 116001, PR  
China.

<sup>†</sup>Email: z63y94x@xmu.edu.cn

<sup>‡</sup>Email: liuwenzhi196507@163.com

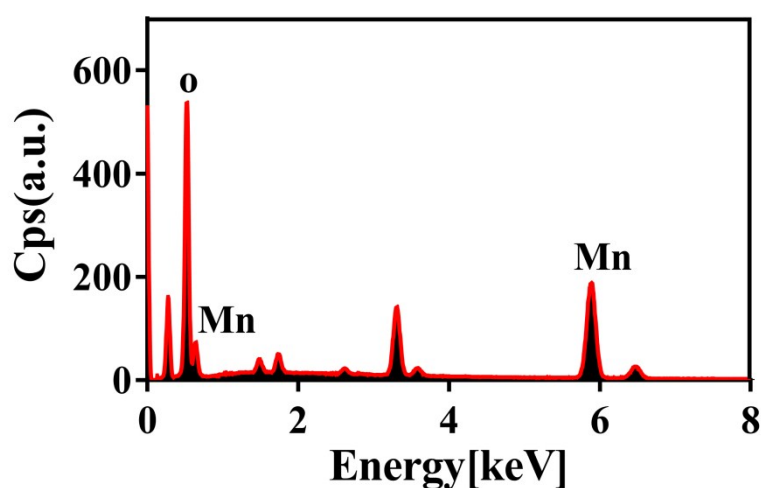

Figure S1. EDS pattern of MnO<sub>2</sub>

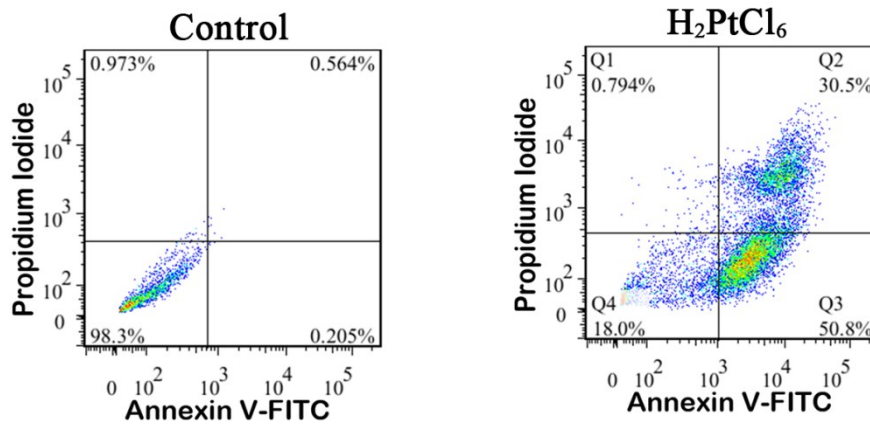

Figure S2. Flow cytometry to detect apoptotic induction of H<sub>2</sub>PtCl<sub>6</sub> (20 μg/mL)

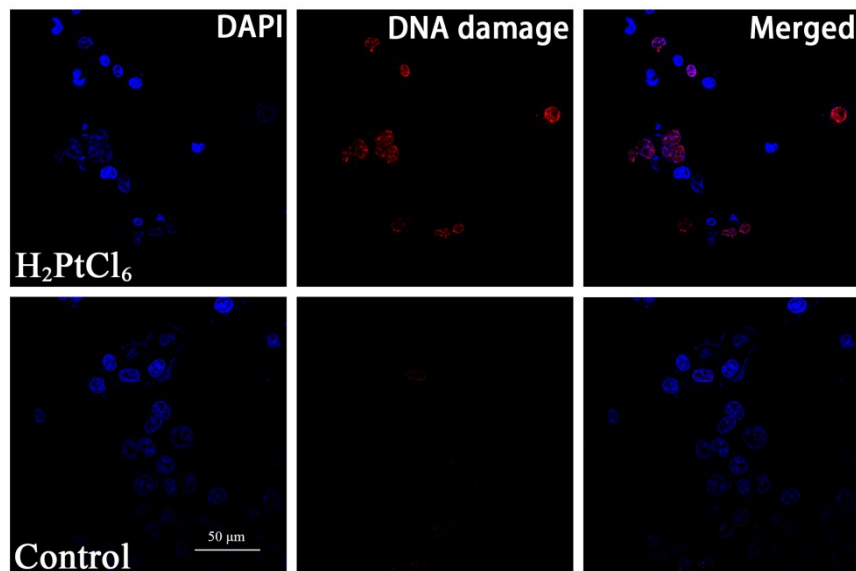

Figure S3. Immunofluorescence staining of  $\gamma$ -H2AX foci in HCT-116 cells treated with H<sub>2</sub>PtCl<sub>6</sub> (20 μg/mL), in which green represents DAPI, and red represents Cy3 labeled double-strand breaks in DNA. Scale bar: 50 μm

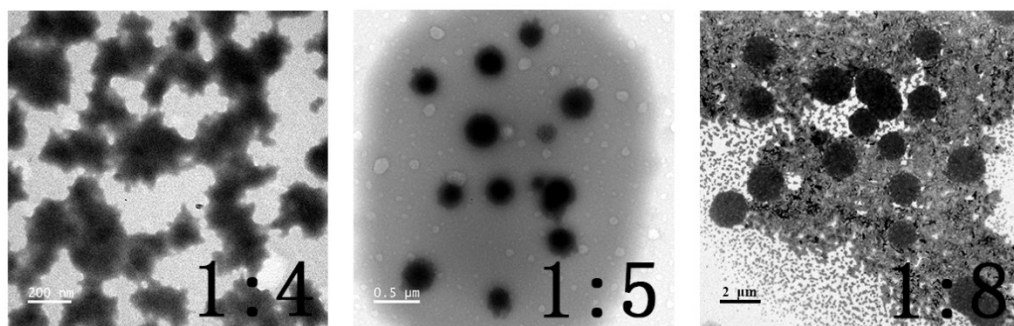

Figure S4. TEM images of HA-H<sub>2</sub>PtCl<sub>6</sub> at different ratios of HA/ H<sub>2</sub>PtCl<sub>6</sub>. The scales are 200, 500, and 2000 nm, respectively

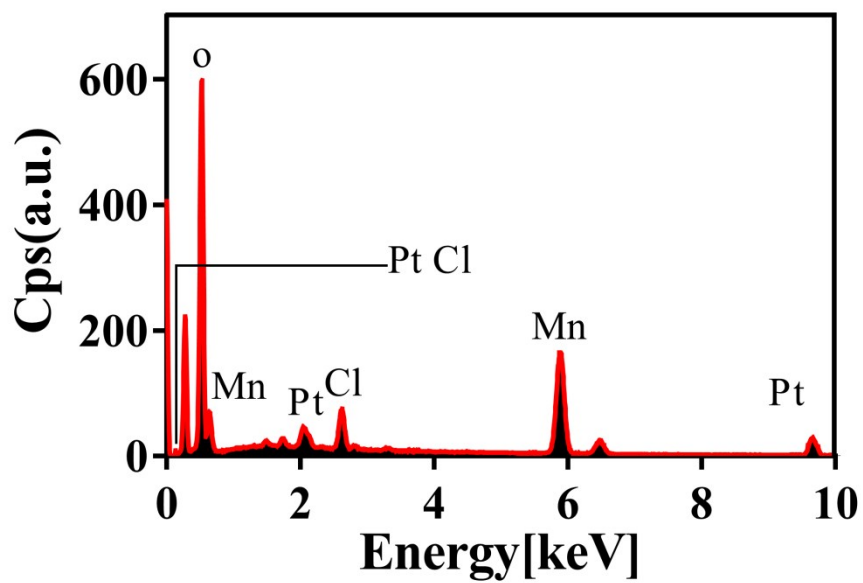

Figure S5. EDS pattern of MHP

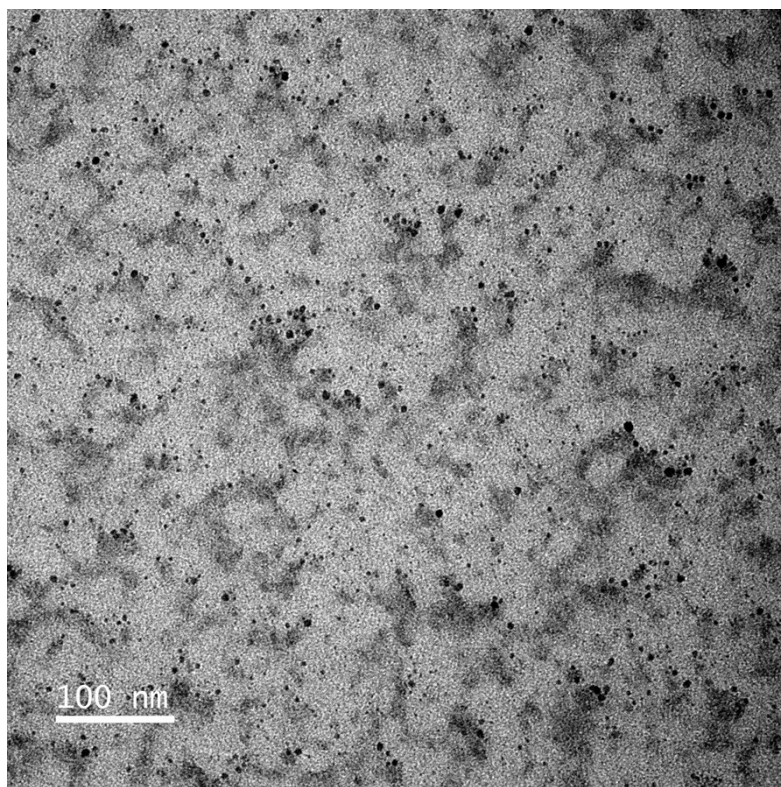

Figure S6. TEM images of MHP after incubation in saline at  $\text{H}_2\text{O}_2=100 \mu\text{M}$  /  $\text{pH}=6.5$  overnight. Scale bar: 100

nm
